# Supplementary material for: Local introduction and heterogeneous spatial spread of dengue-suppressing Wolbachia through an urban population of Aedes aegypti
Source: PLoS Biol. 2017 May 30;15(5):e2001894. doi: 10.1371/journal.pbio.2001894 (PMC5448718; doi:10.1371/journal.pbio.2001894)
Supplement: S4 Table — PP estimates of the parameters in Model (7) obtained with model (S1) to account for non-binomial sources of variation in infection frequencies via the parameter F. For each time interval, we provide Log(L) and the MLEs for r0 and w with interval-specific F (left), or with a common F = 0.167 (right). (XLSX) [file pbio.2001894.s009.xlsx]

## Sheet: Sheet1
	t	Log(L)	r	w	F	Log(L)	r	w
	100	–68.9824	50.	1730.93	0.182687	–69.0605	50.	1819.9
	115	–114.116	57.1592	2000.	0.14458	–114.274	60.6984	2000.
	135	–228.763	76.6126	2000.	0.076420	–238.296	54.8615	2000.
	200	–711.236	307.796	420.238	0.182453	–711.781	308.732	433.855
	275	–164.828	336.902	327.172	0.255859	–166.209	337.162	323.49
	350	–307.233	372.583	314.804	0.258379	–308.256	372.597	310.331
	475	–525.592	396.027	393.551	0.177804	–525.715	394.798	407.524
	625	–212.411	452.632	430.367	0.361003	–217.723	451.496	415.42
	800	–315.666	478.757	419.174	0.108542	–318.313	480.401	447.899
